# Supplementary material
Source: Springer Nature journal article supplement (https://www.springermedizin.de/resource/supplementary/13017_2008_121_MOESM4_ESM.pdf/9635514)

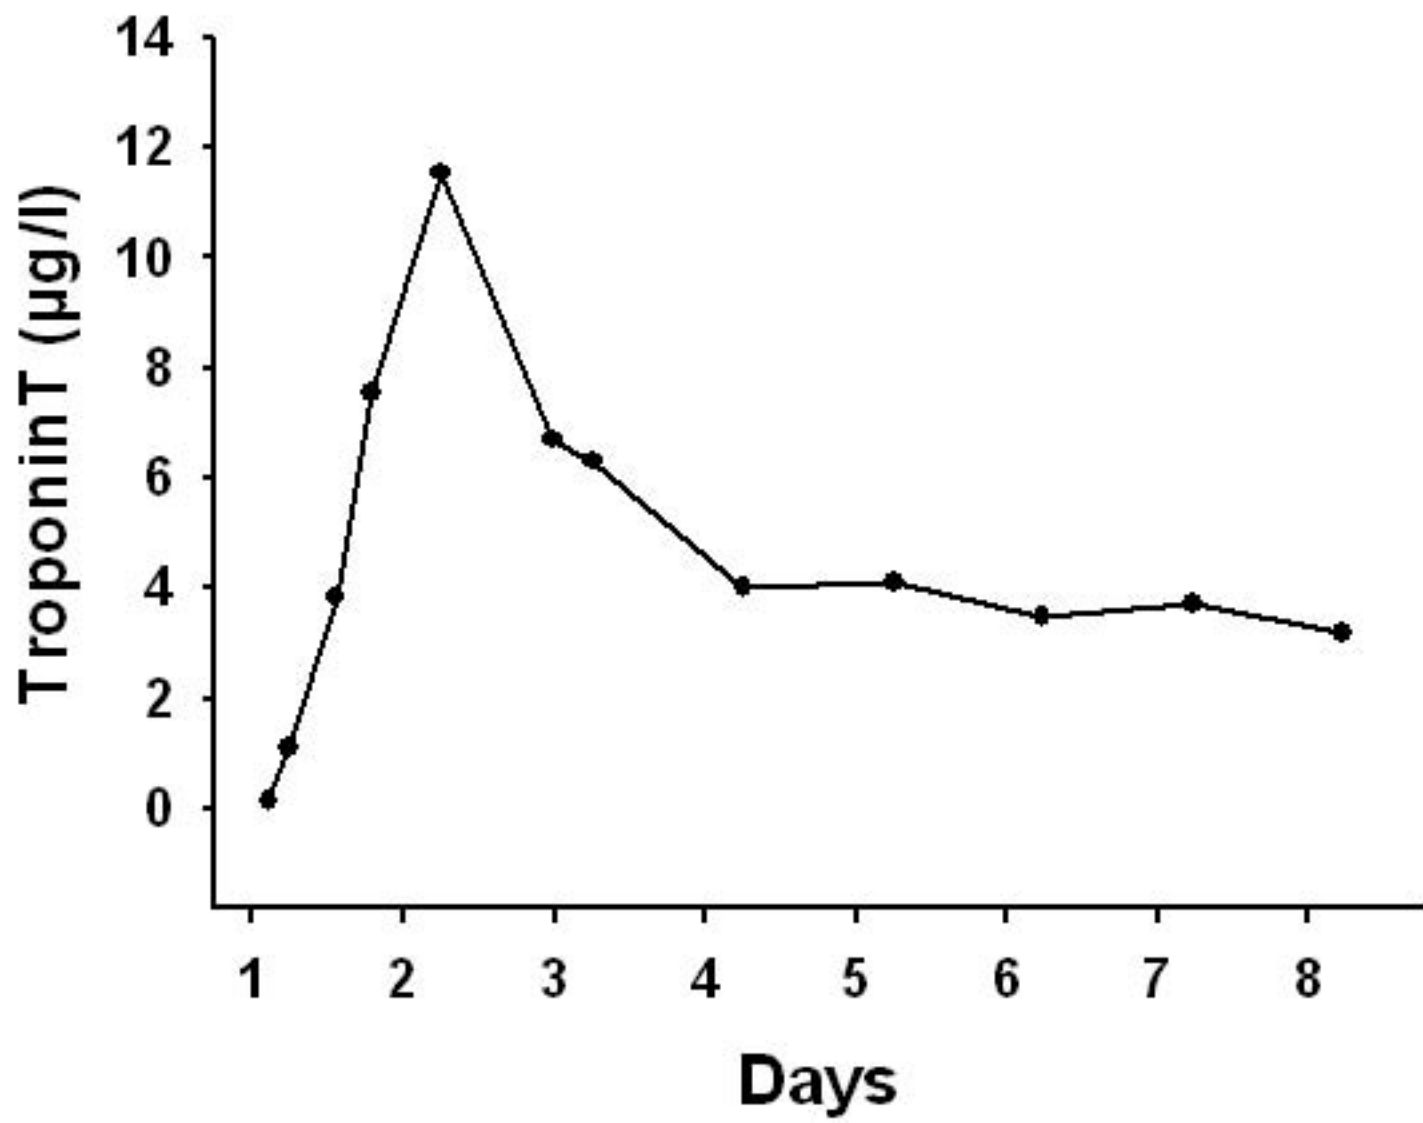

Supplement: MOESM4 [file 9635514]
